# Supplementary material
Source: HighWire-hosted journal article supplement (http://d2538ggaoe6cji.cloudfront.net/highwire/filestream/42662/field_highwire_adjunct_files/1/144394-2.pdf)
Supplement: 144394-2.pdf [file 144394-2.pdf]

JH739890:10.4-10.5 Mb

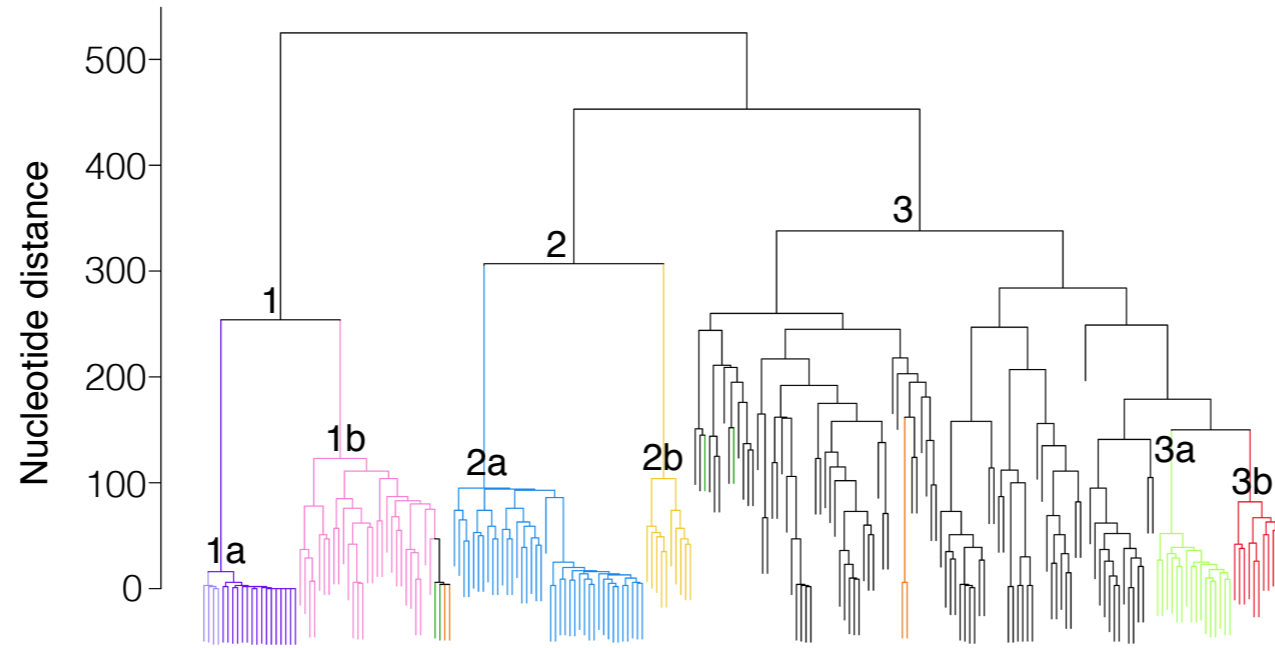

- *Geospiza difficilis* from Wolf (1a)
- *G. difficilis* from Darwin (1a)
- *G. difficilis* from Pinta, Santiago & Fernandina (1b)
- *G. scandens* (1b, 3)
- *Platyspiza crassirostris* (3a)
- *G. fortis* (1b, 3)
- *Certhidea olivacea* (2b)
- *C. fusca* from Española and San Cristobal (2a)
- *Pinaroloxias inornata* (Cocos finch) (3a)
- *Camarhynchus* sp. & remaining *Geospiza* sp. (3)

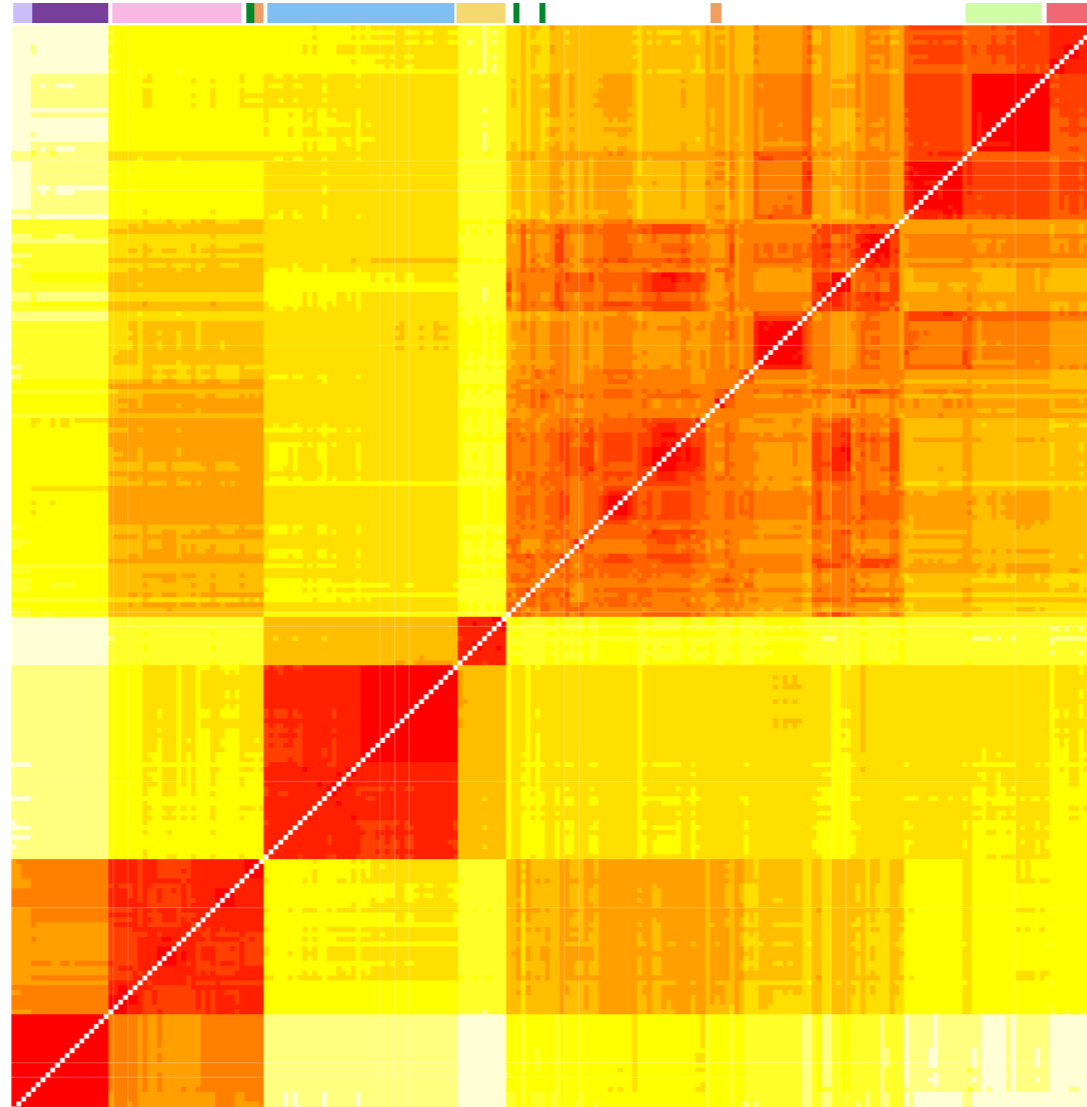

Gene in region:  
*NPY4R*  
Neuropeptide Y receptor Y4
